# Supplementary material for: The role of gas flow distributions on CO2 mineralization within monolithic cemented composites: coupled CFD-factorial design approach
Source: Royal Society of Chemistry journal article supplement (doi:10.1039/d0re00433b), 2021-01-01
Supplement: d0re00433b1.pdf [file d0re00433b1.pdf]

1  
2  
3  
4  
5  
6  
7  
8  
9  
10  
11  
12  
13

## Supporting Information

for

# The role of gas flow distributions on CO<sub>2</sub> mineralization within monolithic cemented composites: Coupled CFD-factorial design approach

*Iman Mehdipour (\*, †), Gabriel Falzone (\*, †), Dale Prentice (\*, †), Narayanan Neithalath (‡), Dante Simonetti (†, §), Gaurav Sant (\*, †, \*\*, ††, &)*

---

\* Laboratory for the Chemistry of Construction Materials (LC<sup>2</sup>), Department of Civil and Environmental Engineering, University of California, Los Angeles, CA 90095, USA

† Institute for Carbon Management (ICM), University of California, Los Angeles, CA 90095, USA

‡ School of Sustainable Engineering and the Built Environment, Arizona State University, Tempe, AZ 85287, USA

§ Department of Chemical and Biomolecular Engineering, University of California, Los Angeles, CA 90095, USA

\*\* Department of Materials Science and Engineering, University of California, Los Angeles, CA 90095, USA

†† California Nanosystems Institute (CNSI), University of California, Los Angeles, CA 90095, USA

& Corresponding author: G. Sant, Phone: (310) 206-3084, Email: [gsant@ucla.edu](mailto:gsant@ucla.edu)

14  
15  
16  
17  
18  
19

Number of pages: 8 (including the title page)

Number of figures: 7

Number of tables: 3

20 **(A) Oxide composition of binders**

21 The bulk oxide composition of the fly ash and ordinary portland cement (OPC) is presented in  
 22 Table S1. The median particle size diameters ( $d_{50}$ ) of the portlandite, fly ash, and OPC were  
 23 determined as 3.8  $\mu\text{m}$ , 8.9  $\mu\text{m}$ , and 17.2  $\mu\text{m}$ , respectively, using static light scattering (SLS;  
 24 LS13-320, Beckman Coulter). Their densities were measured as 2340  $\text{kg/m}^3$ , 2440  $\text{kg/m}^3$ , and  
 25 3140  $\text{kg/m}^3$ , respectively, using helium pycnometry (Accupyc II 1340, Micromeritics).  
 26

| Table S1: Oxide composition (by mass) of the fly ash and OPC as determined by X-ray fluorescence (XRF). |          |       |
|---------------------------------------------------------------------------------------------------------|----------|-------|
| Oxide                                                                                                   | Mass (%) |       |
|                                                                                                         | Fly ash  | OPC   |
| SiO <sub>2</sub>                                                                                        | 51.60    | 20.60 |
| Al <sub>2</sub> O <sub>3</sub>                                                                          | 21.65    | 4.64  |
| Fe <sub>2</sub> O <sub>3</sub>                                                                          | 16.81    | 2.80  |
| SO <sub>3</sub>                                                                                         | 0.50     | 2.93  |
| CaO                                                                                                     | 2.18     | 64.28 |
| Na <sub>2</sub> O                                                                                       | 0.82     | 0.18  |
| MgO                                                                                                     | 0.78     | 2.03  |
| K <sub>2</sub> O                                                                                        | 2.29     | 0.32  |

27

28 **(B) Concrete block forming process**

29 Figure S1 presents photographs of the block-making machine (Stonemaker DM100) that was  
 30 used to produce standard concrete masonry units (CMUs) herein.  
 31

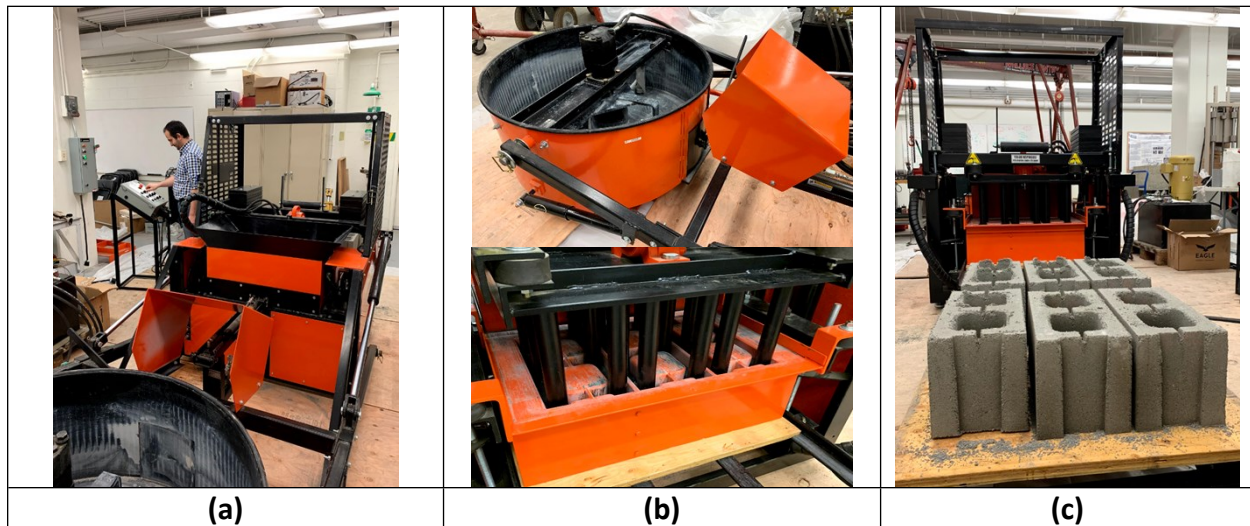

**Figure S1:** Photographs of the block-making machine system used for the production of prototype concrete masonry units, including (a) a view of the block-making machine and control panel, (b) a view of the pan-style mixer and mold press setup, and (c) a view of the product offload track after extracting freshly produced concrete masonry units.

32

33 The machine performs mixing, material loading, and block forming actions – via hydraulic  
 34 actuation – and is controlled by a digital control panel (Figure S1a). Fresh mixtures (containing  
 35 the binder, aggregate, and water) are batched and homogenized in a pan mixer (Figure S1b).  
 36 The mixing container is raised hydraulically to drop the homogenized concrete mixture into a  
 37 hopper. The hopper then feeds the material into the block mold (Figure S1b), which forms three  
 38 CMUs simultaneously. The top section of the mold compacts the materials into a block shape  
 39 by hydraulic compaction and vibration. The formed blocks – i.e., fresh masonry units, or “green  
 40 bodies” – are loaded on plywood pallets and ejected on a track for off-loading (Figure S1c).

41

#### 42 (C) Factorial Design-of-Experiments

43 Table S2 presents the factorial Design-of-Experiments (DoE) that was used to assess the effects  
 44 of gas processing parameters ( $T$ ,  $RH$ , and  $Q$ ) on the carbonation of concrete blocks. Factorial  
 45 DoE consists of three different parts: (i) factorial part ( $2^n$ ,  $n$ : number of design variables), (ii)  
 46 central part, and (iii) validation part within the design space. The significance of variables and  
 47 their interactions are determined by the analysis of variance (ANOVA) using the least-squares  
 48 fitting. In this study, the probability (P-values) less than 0.05 was considered as a level of  
 49 significance.<sup>1</sup> For this series of experiments, the concrete blocks were first dried under  
 50 exposure to flowing air to achieve different initial  $S_w$  prior to the carbonation process.

51

| <b>Table S2:</b> Factorial Design-of-Experiments to assess the effects of gas processing parameters on carbonation of concrete block. The upper and lower bounds for each design variable are indicated. The top flow configuration was applied to all cases. |            |             |      |       |                |          |            |
|---------------------------------------------------------------------------------------------------------------------------------------------------------------------------------------------------------------------------------------------------------------|------------|-------------|------|-------|----------------|----------|------------|
| Type                                                                                                                                                                                                                                                          | Mixture ID | Coded value |      |       | Absolute value |          |            |
|                                                                                                                                                                                                                                                               |            | $T$         | $RH$ | $Q$   | $T$ (°C)       | $RH$ (%) | $Q$ (slpm) |
| Factorial points                                                                                                                                                                                                                                              | 1          | -1.0        | -1.0 | -1.0  | 20             | 20       | 0.10       |
|                                                                                                                                                                                                                                                               | 2          | -1.0        | -1.0 | 1.0   | 20             | 20       | 4.92       |
|                                                                                                                                                                                                                                                               | 3          | -1.0        | 1.0  | -1.0  | 20             | 60       | 0.10       |
|                                                                                                                                                                                                                                                               | 4          | 1.0         | -1.0 | -1.0  | 50             | 20       | 0.10       |
|                                                                                                                                                                                                                                                               | 5          | -1.0        | 1.0  | 1.0   | 20             | 60       | 4.92       |
|                                                                                                                                                                                                                                                               | 6          | 1.0         | -1.0 | 1.0   | 50             | 20       | 4.92       |
|                                                                                                                                                                                                                                                               | 7          | 1.0         | 1.0  | -1.0  | 50             | 60       | 0.10       |
|                                                                                                                                                                                                                                                               | 8          | 1.0         | 1.0  | 1.0   | 50             | 60       | 4.92       |
| Central points for 3 replicates                                                                                                                                                                                                                               | 9          | 0.0         | 0.0  | 0.0   | 35             | 40       | 2.51       |
| Validation points                                                                                                                                                                                                                                             | 10         | 0.33        | 0.50 | -0.21 | 40             | 50       | 2.0        |
|                                                                                                                                                                                                                                                               | 11         | 1.0         | -1.0 | -0.50 | 50             | 20       | 1.30       |
|                                                                                                                                                                                                                                                               | 12         | 0.0         | -1.0 | 0.20  | 35             | 20       | 3.0        |
|                                                                                                                                                                                                                                                               | 13         | 1.0         | 0.0  | 0.41  | 50             | 40       | 3.50       |

52

#### 53 (D) Sampling procedure for CO<sub>2</sub> uptake characterization

54 Figure S2 depicts the powder sampling procedure for each block section (i.e., 2 sides, 2 faces,  
 55 and web) to assess the variation of CO<sub>2</sub> uptake across different concrete block sections.

56

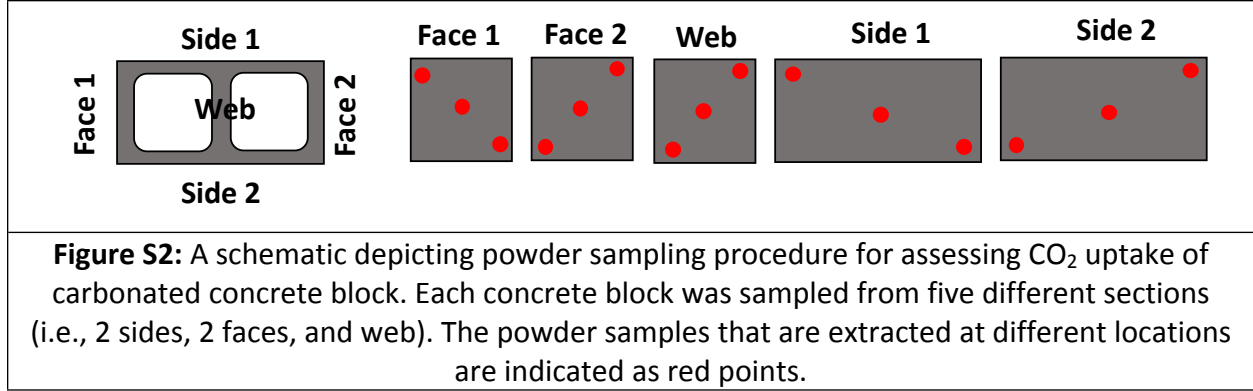

57

58 **(E) CFD and FEM governing equations**

59 **CFD modeling:** In the  $k - \omega$  model, the turbulent kinetic energy  $k$  and specific turbulent  
60 dissipation rate  $\omega$  describe turbulence flow. The equations governing the  $k$  and  $\omega$  are given by<sup>2</sup>:

$$\frac{\partial}{\partial t}(\rho k) + \frac{\partial}{\partial x_j}(\rho u_j k) = \rho \tau_{ij} \frac{\partial u_i}{\partial x_j} - \beta^* \rho k \omega + \frac{\partial}{\partial x_j} \left[ \left( \mu + \sigma^* \frac{\rho k}{\omega} \right) \frac{\partial k}{\partial x_j} \right] \quad \text{[Eq. S1]}$$

$$\frac{\partial}{\partial t}(\rho \omega) + \frac{\partial}{\partial x_j}(\rho u_j \omega) = \alpha \frac{\omega}{k} \rho \tau_{ij} \frac{\partial u_i}{\partial x_j} - \beta \rho \omega^2 + \sigma_d \frac{\rho}{\omega} \frac{\partial k}{\partial x_j} \frac{\partial \omega}{\partial x_j} + \frac{\partial}{\partial x_j} \left[ \left( \mu + \sigma \frac{\rho k}{\omega} \right) \frac{\partial \omega}{\partial x_j} \right] \quad \text{[Eq. S2]}$$

61 where  $\rho$  is the mean mass density,  $x_j$  is the position vector,  $u_j$  is the velocity vector,  $\mu$  is the  
62 eddy viscosity, and  $\tau_{ij}$  is the Reynolds-stress tensor.  $\sigma^*$  and  $\beta^*$  are closure coefficients in the  
63 turbulence-kinetic energy equation. The  $k$  and  $\omega$  can be approximated by<sup>2</sup>:

$$k = \frac{3}{2} (u I_T)^2 \quad \text{[Eq. S3]}$$

$$\omega = \frac{\sqrt{k}}{(\beta_0^*)^{1/4} L_T} \quad \text{[Eq. S4]}$$

64 where  $I_T$  and  $L_T$  are turbulent intensity and turbulent length scale, respectively, which are  
65 estimated as<sup>2-4</sup>:

$$I_T = 0.16(Re)^{-1/8} \quad \text{[Eq. S5]}$$

$$L_T = 0.07 d_{inlet} \quad \text{[Eq. S6]}$$

66 where  $d_{inlet}$  is the gas inlet diameter. The  $I_T$  and  $L_T$  were calculated as 0.05 and 0.00043 m,  
67 respectively, and the parameter  $\beta_0^*$  was taken as 0.09.<sup>2</sup>

68

69 **FEM simulation:** The linear elastic boundary value problem in each component of the  
70 composite material is defined by the (i) differential equilibrium equations, (ii) the strain-  
71 displacement relationships, and (iii) the constitutive relations. First, in the absence of body  
72 forces, the differential equilibrium equation in any component is expressed as<sup>5</sup>:

$$\nabla \cdot \sigma = 0 \quad \text{[Eq. S7]}$$

73 Second, the strain–displacement relation in any component is given by:

$$\epsilon = \frac{1}{2} [\nabla u + \nabla^T u] \quad \text{[Eq. S8]}$$

74 where  $u = [u, v, w]^T$  is the displacement vector. Finally, the linear elastic constitutive relation is  
 75 given by:

$$\sigma = C : \epsilon \quad \text{[Eq. S9]}$$

76 where  $\sigma$  and  $\epsilon$  are the stress and strain tensors, respectively, and  $C$  is the fourth-order stiffness  
 77 tensor. The latter is a property of the material and depends on its microstructure and  
 78 temperature. For homogeneous and isotropic materials, the tensor  $C$  is given by:

$$C_{ijkl} = \lambda \delta_{ij} \delta_{kl} + \mu (\delta_{ik} \delta_{jl} + \delta_{il} \delta_{jk}) \quad \text{[Eq. S10]}$$

79 where  $\lambda$  and  $\mu$  are the Lamé parameters, and  $\delta_{\alpha\beta}$  denotes a Kronecker delta. The material  
 80 tensor in Eq. (S10) can also be expressed in terms of elastic moduli, using the following  
 81 identities:

$$\lambda = \frac{E\nu}{(1+\nu)(1-2\nu)} = K - \frac{2}{3}G \quad \text{and} \quad \mu = \frac{E}{2(1+\nu)} = G \quad \text{[Eq. S11]}$$

82 where  $E$ ,  $K$ , and  $G$  are the Young's, bulk, and shear moduli, respectively, and  $\nu$  is the Poisson's  
 83 ratio. Combining Eqs. (S7)–(S9) results in governing equations expressed solely in terms of the  
 84 displacement field. These equations are referred to as Navier's equations that are given by:

$$(\lambda_1 + \mu_1) \nabla(\nabla \cdot u_i) + \mu_1 \nabla^2 u_i = 0 \quad \text{[Eq. S12]}$$

85

### 86 (F) CO<sub>2</sub> uptake variations

87 Figure S3(a) shows the variations of CO<sub>2</sub> uptake for the different concrete block's sections for  
 88 different gas flow configurations. Top flow provided the most uniform carbonation. The strong  
 89 dependence of carbonation rate constant on drying rate constant is indicated in Figure S3(b).

90

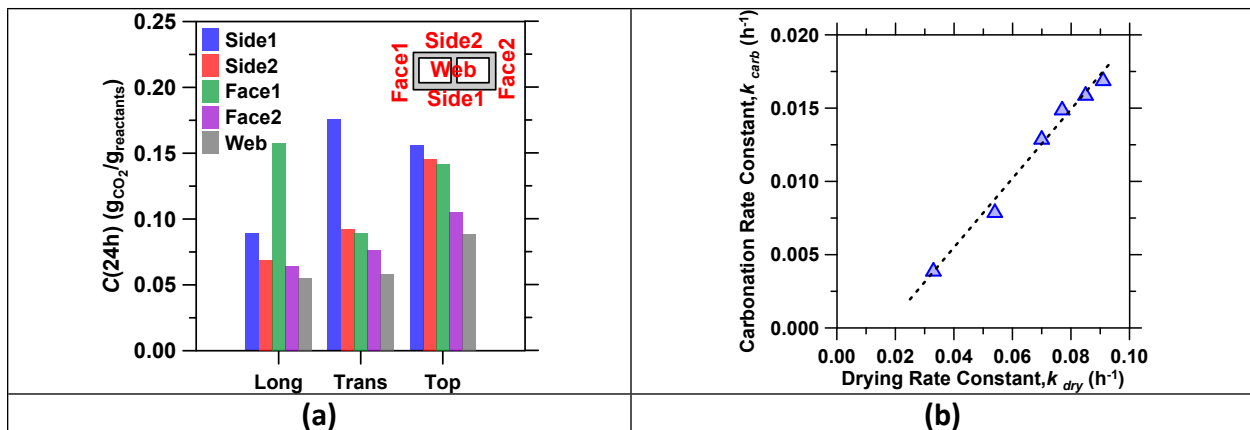

**Figure S3: (a)** The variations in the 24-h CO<sub>2</sub> uptake of different sections of the concrete block under different gas flow configurations. **(b)** The dependence of carbonation rate constant on drying rate constant. In all carbonation experiments, gas stream featured [CO<sub>2</sub>] = 12.5 % at  $T = 70$  °C,  $RH = 50$  %, and 2.45 slpm flow rate. In drying experiments, the air stream featured [CO<sub>2</sub>] = 0.04 %,  $T = 70$  °C,  $RH = 50$  %, and 2.45 slpm flow rate.

91

### 92 (G) CFD simulations of contacting gas velocity

93 The variations in contacting gas velocity across the concrete block's surfaces are indicated in  
 94 Figure S4(a). Increasing contacting gas velocity resulted in a higher reduction of pore water

95 saturation  $S_w$  (Figure S4b). The effect of contacting gas velocity on CO<sub>2</sub> uptake for different  
 96 sections of concrete block is displayed in Figure S4(c).  
 97

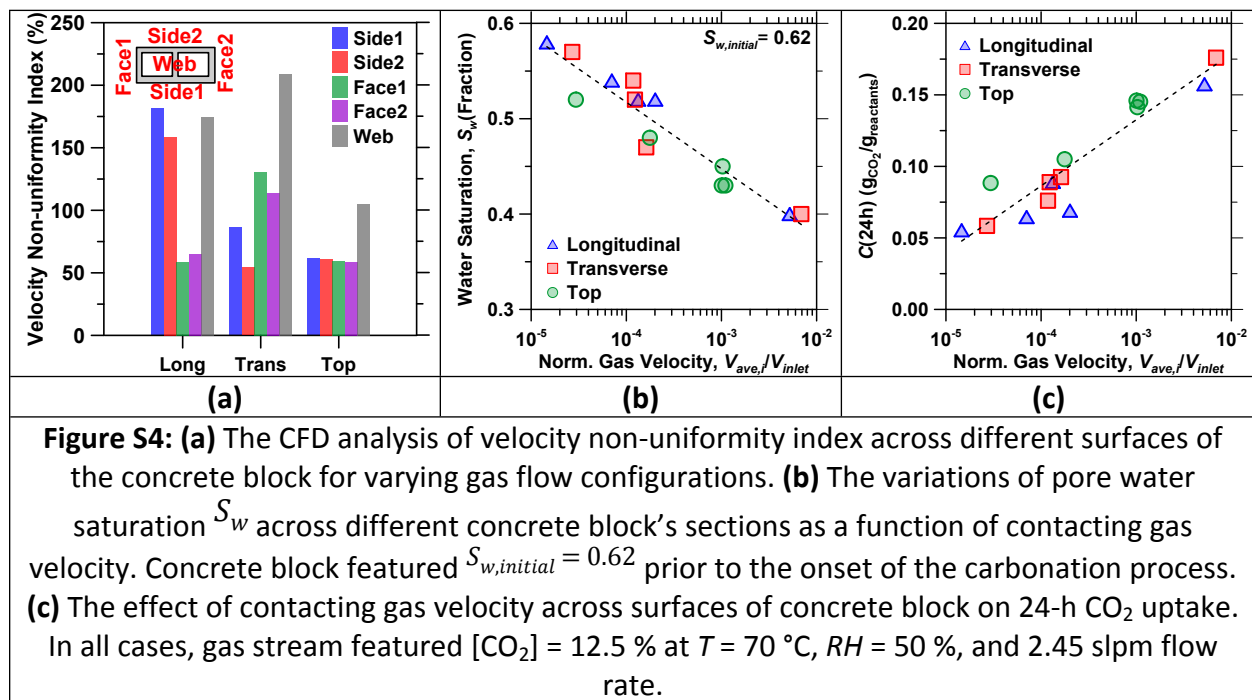

98

99 **(H) Derivation of statistical prediction models**

100 Table S3 presents the ANOVA results and derived statistical prediction models for pore water  
 101 saturation and CO<sub>2</sub> uptake.  
 102

**Table S3:** Analysis of variance (ANOVA) results of factorial design used for carbonation performance evaluation of concrete block.

| Response                                               | Parameter | F value | p-value<br>Prob > F | Contribution<br>(Actual factor) | R <sup>2</sup> | R <sup>2</sup> <sub>adj</sub> |
|--------------------------------------------------------|-----------|---------|---------------------|---------------------------------|----------------|-------------------------------|
| $S_{w,drying}$ (after drying and prior to carbonation) | Model     | 13.20   | 0.0072              |                                 |                |                               |
|                                                        | Constant  |         |                     | 0.62890                         |                |                               |
|                                                        | $T$       | 9.18    | 0.0291              | -0.00397                        |                |                               |
|                                                        | $RH$      | 23.62   | 0.0046              | 0.00198                         |                |                               |
|                                                        | $Q$       | 12.54   | 0.0165              | -0.07348                        | 0.92           | 0.85                          |
|                                                        | $T * RH$  |         |                     | NS                              |                |                               |
|                                                        | $T * Q$   |         |                     | NS                              |                |                               |
|                                                        | $RH * Q$  | 7.46    | 0.0412              | 0.00111                         |                |                               |
| C(24h)                                                 | Curvature | 1.97    | 0.2195              |                                 |                |                               |
|                                                        | Model     | 16.48   | 0.0044              |                                 |                |                               |
|                                                        | Constant  |         |                     | -0.00592                        |                |                               |
|                                                        | $T$       | 5.23    | 0.0709              | 0.00127                         | 0.93           | 0.87                          |
|                                                        | $RH$      | 19.38   | 0.0070              | -0.00022                        |                |                               |
|                                                        | $Q$       | 27.48   | 0.0033              | 0.04373                         |                |                               |

|           |       |        |          |
|-----------|-------|--------|----------|
| $T^*RH$   |       | NS     |          |
| $T^*Q$    |       | NS     |          |
| $RH^*Q$   | 13.85 | 0.0137 | -0.00064 |
| Curvature | 7.95  | 0.0371 |          |

**Notes:**  $T$ : gas temperature.  $RH$ : gas relative humidity.  $Q$ : gas flow rate. NS: not significant. Values of "Prob > F" less than 0.05 indicate that model terms are significant. The "Prob > F" determines if the curvature of response is significant as measured by the difference between the average of the central points and the average of the factorial points in the design space.

103

104 Figure S5 compares the accuracy of the derived statistical prediction model for the 24-h  $\text{CO}_2$   
 105 uptake response for four additional gas processing conditions within the design space. The two  
 106 diagonal dashed lines represent 95 % confidence interval bounds. The predicted data points lie  
 107 reasonably close to the 1:1 diagonal line, confirming the validity of the prediction model.

108

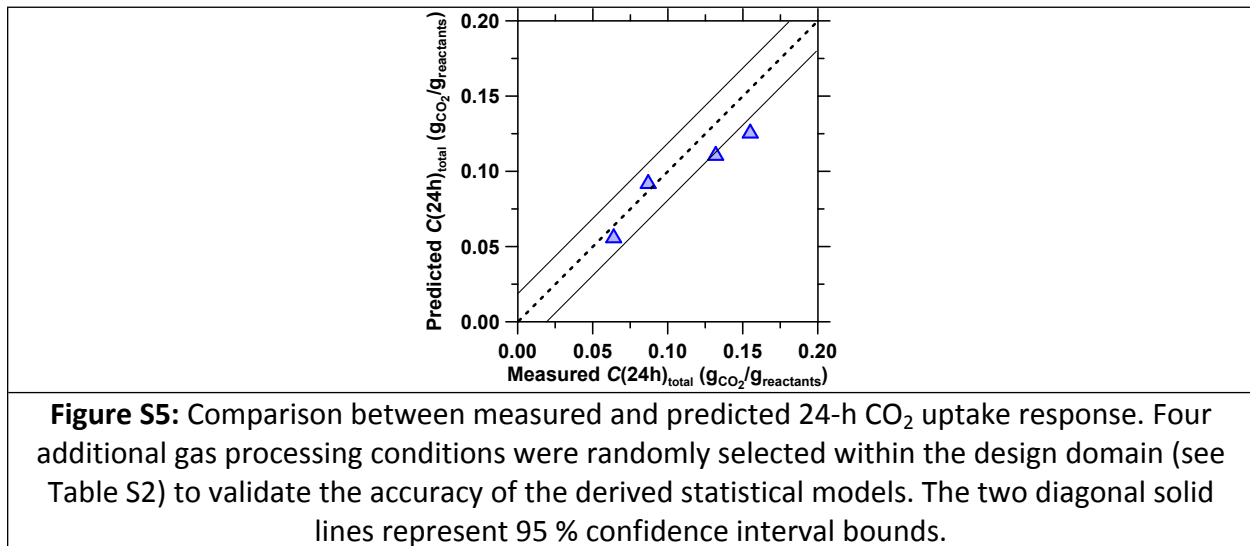

109

### 110 (I) Desirability response for multivariable optimization

111 Figure S6 displays an example of the desirability response surface of gas processing conditions  
 112 to meet the performance targets. The targets were defined as maximizing the overall  $\text{CO}_2$   
 113 uptake and minimizing the non-uniformity of  $\text{CO}_2$  uptake across different block's sections.  
 114 Increasing gas flow rate and decreasing gas  $RH$  results in enhanced desirability response so long  
 115 as the pore water saturation of concrete block exceeds the critical value;  $S_w > S_{w,c} \approx 0.10$ .

116



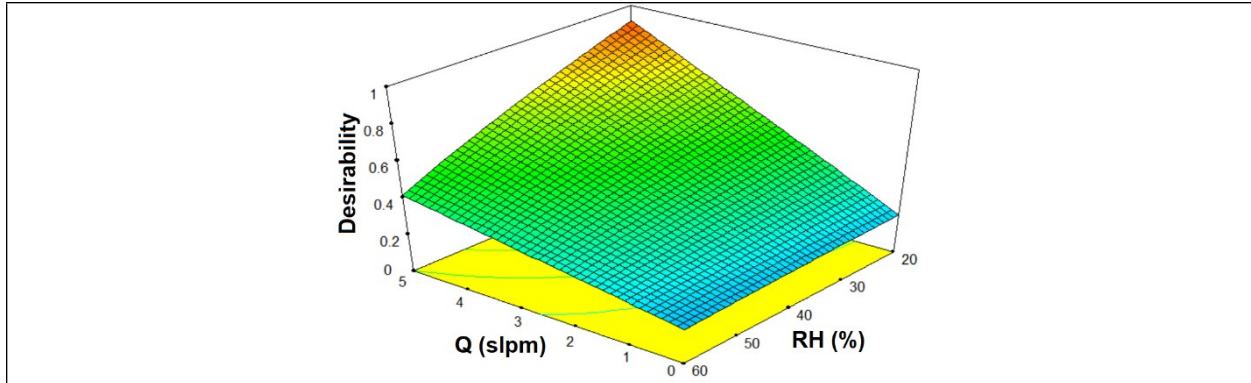

**Figure S6:** Desirability surface response of gas processing conditions to satisfy the defined performance targets. The desirability value close to 1 determines the optimal combination of variables that satisfies the target properties.

117

118 **(J) FEM analysis of the uniaxial compressive response of concrete block**

119 The FEM simulations of stress-displacement responses of carbonated concrete blocks that were  
 120 subjected to different gas flow configurations are shown in Figure S7. The reference concrete  
 121 block was modeled using an equivalent Young's modulus of 14 GPa<sup>6</sup> for all block's sections.

122

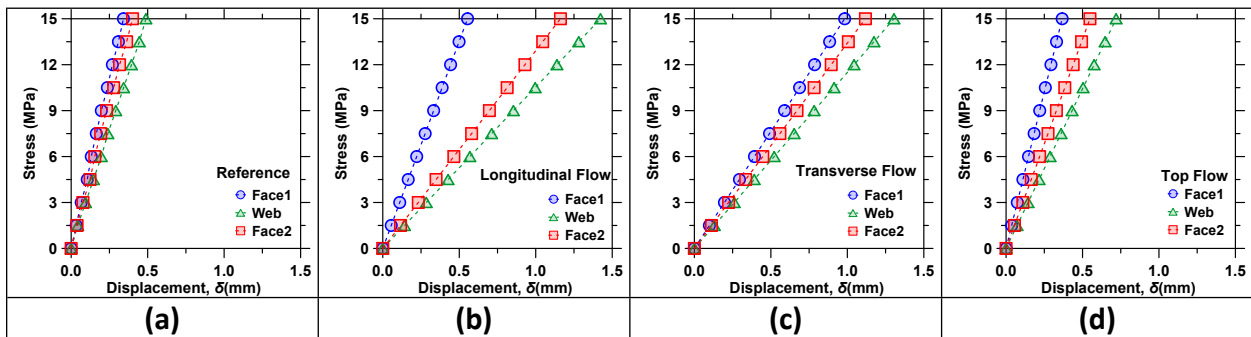

**Figure S7:** FEM simulations of uniaxial compressive stress-displacement responses for different sections of: **(a)** reference block, and for **(b)** longitudinal flow, **(c)** transverse flow, and **(d)** top flow configurations.

123

124 **REFERENCES**

125 1 D. C. Montgomery, *Design and analysis of experiments*, John Wiley & Sons, 2017.  
 126 2 D. C. Wilcox, *Turbulence modeling for CFD*, DCW industries La Canada, CA, 1998, vol. 2.  
 127 3 Y. Chen, F. Arbeiter and G. Schlindwein, *Numer. Heat Transf. Part Appl.*, 2012, **61**, 38–60.  
 128 4 C. Multiphysics and C. Module, *Version COMSOL Multiphysics*.  
 129 5 K. D. Hjelmstad, *Fundamentals of structural mechanics*, Springer Science & Business Media, 2007.  
 130 6 M. S. J. Committee, *Mason. Soc. Boulder CO*.

131
